# Supplementary material for: Aerosol Composition Trends during 2000–2020: In depth insights from model predictions and multiple worldwide observation datasets
Source: Copernicus journal article supplement (doi:10.5194/egusphere-2024-3590), 2024-12-04
Supplement: Supplementary file 1 [file egusphere-2024-3590-supplement.pdf]

**Table S1:** Number of observation sites and datasets per subcontinent and region type for PM<sub>1</sub> and OA factor analysis.

|                                                     | <b>#Sites of PM<sub>1</sub><br/>data</b> | <b>#PM<sub>1</sub><br/>datasets</b> | <b>#Sites of OA<br/>factor analysis</b> | <b>#OA<br/>datasets</b> |
|-----------------------------------------------------|------------------------------------------|-------------------------------------|-----------------------------------------|-------------------------|
| <b>Europe</b>                                       | 58                                       | 431                                 | 46                                      | 130                     |
| Rural                                               | 29                                       | 240                                 | 25                                      | 84                      |
| Downwind                                            | 17                                       | 155                                 | 13                                      | 24                      |
| Urban                                               | 12                                       | 36                                  | 8                                       | 22                      |
| <b>North-America</b>                                | 35                                       | 88                                  | 27                                      | 68                      |
| Rural                                               | 17                                       | 46                                  | 12                                      | 35                      |
| Downwind                                            | 5                                        | 7                                   | 4                                       | 6                       |
| Urban                                               | 13                                       | 35                                  | 11                                      | 27                      |
| <b>Eastern Asia</b>                                 | 48                                       | 153                                 | 45                                      | 148                     |
| Rural                                               | 17                                       | 44                                  | 17                                      | 37                      |
| Downwind                                            | 11                                       | 16                                  | 10                                      | 16                      |
| Urban                                               | 20                                       | 93                                  | 18                                      | 95                      |
| <b>Latin America &amp; Caribbean</b>                | 10                                       | 18                                  | 8                                       | 14                      |
| Rural                                               | 5                                        | 7                                   | 2                                       | 2                       |
| Downwind                                            | 2                                        | 4                                   | 3                                       | 5                       |
| Urban                                               | 3                                        | 7                                   | 3                                       | 7                       |
| <b>Africa</b>                                       | 3                                        | 14                                  | 3                                       | 5                       |
| Rural                                               | 1                                        | 12                                  | 1                                       | 3                       |
| Downwind                                            | 1                                        | 1                                   | 1                                       | 1                       |
| Urban                                               | 1                                        | 1                                   | 1                                       | 1                       |
| <b>Southern Asia</b>                                | 5                                        | 19                                  | 5                                       | 19                      |
| Rural                                               | 1                                        | 5                                   | 1                                       | 5                       |
| Downwind                                            | 0                                        | 0                                   | 0                                       | 0                       |
| Urban                                               | 4                                        | 14                                  | 4                                       | 14                      |
| <b>South-East Asia &amp; Developing<br/>Pacific</b> | 3                                        | 4                                   | 1                                       | 2                       |
| Rural                                               | 2                                        | 2                                   | 0                                       | 0                       |
| Downwind                                            | 0                                        | 0                                   | 0                                       | 0                       |
| Urban                                               | 1                                        | 2                                   | 1                                       | 2                       |
| <b>Asia-Pacific Developed</b>                       | 7                                        | 17                                  | 5                                       | 12                      |
| Rural                                               | 5                                        | 13                                  | 4                                       | 10                      |
| Downwind                                            | 1                                        | 1                                   | 0                                       | 0                       |
| Urban                                               | 1                                        | 3                                   | 1                                       | 2                       |
| <b>Total</b>                                        | 169                                      | 744                                 | 140                                     | 398                     |

**Table S2:** Statistical evaluation of EMAC PM<sub>1</sub> components against AMS and ACSM datasets over the tropical and subtropical regions of Latin America and Caribbean, Africa, Southeast Asia and developing Pacific, and Asia Pacific developed during 2000–2020.

| Continent                       | Element                       | Number of data sets | Mean observed [ $\mu\text{gm}^{-3}$ ] | Mean predicted [ $\mu\text{gm}^{-3}$ ] | MAGE [ $\mu\text{gm}^{-3}$ ] | MB [ $\mu\text{gm}^{-3}$ ] | NME [%] | NMB [%] | RMSE [ $\mu\text{gm}^{-3}$ ] |
|---------------------------------|-------------------------------|---------------------|---------------------------------------|----------------------------------------|------------------------------|----------------------------|---------|---------|------------------------------|
| Latin America & Caribbean       | OA                            | 21                  | 8.39                                  | 5.51                                   | 5.46                         | -2.89                      | 65.04   | -34.41  | 8.12                         |
|                                 | SO <sub>4</sub> <sup>2-</sup> | 19                  | 1.21                                  | 0.84                                   | 0.44                         | -0.37                      | 36.29   | -30.4   | 0.59                         |
|                                 | NO <sub>3</sub> <sup>-</sup>  | 19                  | 1.43                                  | 0.7                                    | 0.91                         | -0.73                      | 63.78   | -50.91  | 1.93                         |
|                                 | NH <sub>4</sub> <sup>+</sup>  | 19                  | 0.95                                  | 0.37                                   | 0.58                         | -0.57                      | 61.46   | -60.68  | 1.11                         |
| Africa                          | OA                            | 14                  | 3.42                                  | 5.51                                   | 2.41                         | 2.09                       | 70.34   | 61.04   | 3.3                          |
|                                 | SO <sub>4</sub> <sup>2-</sup> | 14                  | 1.93                                  | 1.23                                   | 1.06                         | -0.71                      | 55.12   | -36.55  | 1.36                         |
|                                 | NO <sub>3</sub> <sup>-</sup>  | 14                  | 0.42                                  | 0.8                                    | 0.43                         | 0.38                       | 103.78  | 91.22   | 0.67                         |
|                                 | NH <sub>4</sub> <sup>+</sup>  | 14                  | 0.8                                   | 0.48                                   | 0.47                         | -0.32                      | 58.86   | -39.59  | 0.54                         |
| South Asia & Developing Pacific | OA                            | 23                  | 33.26                                 | 18.59                                  | 19.24                        | -14.67                     | 57.85   | -44.1   | 28.99                        |
|                                 | SO <sub>4</sub> <sup>2-</sup> | 23                  | 7.01                                  | 4.02                                   | 4.28                         | -2.99                      | 61.07   | -42.66  | 5.48                         |
|                                 | NO <sub>3</sub> <sup>-</sup>  | 22                  | 5.39                                  | 5.21                                   | 3.1                          | -0.17                      | 57.56   | -3.23   | 4.53                         |
|                                 | NH <sub>4</sub> <sup>+</sup>  | 22                  | 5.24                                  | 2.76                                   | 3.42                         | -2.48                      | 65.36   | -47.39  | 5.25                         |
| Asia-Pacific Developed          | OA                            | 17                  | 5.8                                   | 2.54                                   | 3.4                          | -3.26                      | 58.64   | -56.14  | 4.64                         |
|                                 | SO <sub>4</sub> <sup>2-</sup> | 17                  | 4.84                                  | 2.3                                    | 2.66                         | -2.53                      | 54.96   | -52.35  | 3.46                         |
|                                 | NO <sub>3</sub> <sup>-</sup>  | 17                  | 0.79                                  | 1.53                                   | 1.16                         | 0.74                       | 146.03  | 92.84   | 1.4                          |
|                                 | NH <sub>4</sub> <sup>+</sup>  | 17                  | 1.58                                  | 0.79                                   | 0.89                         | -0.8                       | 56.35   | -50.29  | 1.05                         |

**Table S3:** Statistical evaluation of EMAC PM<sub>1</sub> SOA-sv concentrations against AMS and ACSM datasets over Europe, North America, and Eastern Asia during 2000–2020.

| Continent     | Region | Number of data sets | Mean observed [ $\mu\text{gm}^{-3}$ ] | Mean predicted [ $\mu\text{gm}^{-3}$ ] | MAGE [ $\mu\text{gm}^{-3}$ ] | MB [ $\mu\text{gm}^{-3}$ ] | NME [%] | NMB [%] | RMSE [ $\mu\text{gm}^{-3}$ ] |
|---------------|--------|---------------------|---------------------------------------|----------------------------------------|------------------------------|----------------------------|---------|---------|------------------------------|
| Europe        | all    | 82                  | 1.18                                  | 1.08                                   | 0.63                         | -0.1                       | 53.54   | -8.63   | 0.82                         |
|               | rural  | 58                  | 1.02                                  | 1.04                                   | 0.61                         | 0.02                       | 60.11   | 2.24    | 0.82                         |
|               | DW     | 13                  | 1.49                                  | 0.93                                   | 0.81                         | -0.56                      | 54.14   | -37.54  | 0.95                         |
|               | urban  | 11                  | 1.65                                  | 1.43                                   | 0.52                         | -0.22                      | 31.44   | -13.11  | 0.68                         |
| North-America | all    | 51                  | 1.89                                  | 2.19                                   | 1.22                         | 0.3                        | 64.8    | 15.79   | 1.69                         |
|               | rural  | 28                  | 1.59                                  | 1.94                                   | 0.96                         | 0.34                       | 60.36   | 21.62   | 1.27                         |
|               | DW     | 3                   | 4.33                                  | 1.98                                   | 2.47                         | -2.35                      | 57.14   | -54.34  | 2.96                         |
|               | urban  | 20                  | 1.93                                  | 2.56                                   | 1.4                          | 0.63                       | 72.5    | 32.62   | 1.93                         |
| Eastern Asia  | all    | 100                 | 4.69                                  | 2.68                                   | 2.39                         | -2.01                      | 50.91   | -42.91  | 3.35                         |
|               | rural  | 22                  | 4.03                                  | 2.23                                   | 2.2                          | -1.8                       | 54.69   | -44.61  | 2.76                         |
|               | DW     | 11                  | 3.84                                  | 2.77                                   | 1.2                          | -1.08                      | 31.19   | -28.07  | 1.61                         |
|               | urban  | 67                  | 5.05                                  | 2.81                                   | 2.65                         | -2.24                      | 52.39   | -44.32  | 3.72                         |

**Table S4:** Statistical evaluation of EMAC PM<sub>1</sub> SOA-lv concentrations against AMS and ACSM datasets over Europe, North America, and Eastern Asia during 2000–2020.

| Continent     | Region | Number of data sets | Mean observed [ $\mu\text{gm}^{-3}$ ] | Mean predicted [ $\mu\text{gm}^{-3}$ ] | MAGE [ $\mu\text{gm}^{-3}$ ] | MB [ $\mu\text{gm}^{-3}$ ] | NME [%] | NMB [%] | RMSE [ $\mu\text{gm}^{-3}$ ] |
|---------------|--------|---------------------|---------------------------------------|----------------------------------------|------------------------------|----------------------------|---------|---------|------------------------------|
| Europe        | all    | 92                  | 1.61                                  | 0.7                                    | 1.04                         | -0.91                      | 64.31   | -56.57  | 1.45                         |
|               | rural  | 66                  | 1.53                                  | 0.67                                   | 0.98                         | -0.86                      | 63.54   | -56.24  | 1.48                         |
|               | DW     | 14                  | 1.84                                  | 0.59                                   | 1.42                         | -1.25                      | 77.11   | -68.15  | 1.54                         |
|               | urban  | 12                  | 1.78                                  | 0.99                                   | 0.93                         | -0.78                      | 52.54   | -44.13  | 1.13                         |
| North-America | all    | 60                  | 2.13                                  | 1.61                                   | 1.21                         | -0.52                      | 57.04   | -24.32  | 1.48                         |
|               | rural  | 33                  | 1.9                                   | 1.44                                   | 1.12                         | -0.46                      | 58.77   | -24.04  | 1.36                         |
|               | DW     | 4                   | 2.21                                  | 1.58                                   | 0.67                         | -0.64                      | 30.34   | -28.74  | 0.88                         |
|               | urban  | 23                  | 2.44                                  | 1.85                                   | 1.45                         | -0.58                      | 59.33   | -23.93  | 1.7                          |
| Eastern Asia  | all    | 109                 | 6.42                                  | 0.96                                   | 5.46                         | -5.46                      | 85.06   | -85.03  | 6.81                         |
|               | rural  | 27                  | 4.59                                  | 0.87                                   | 3.72                         | -3.72                      | 81.19   | -81.03  | 4.61                         |
|               | DW     | 11                  | 4.92                                  | 1.09                                   | 3.83                         | -3.83                      | 77.87   | -77.87  | 5.11                         |
|               | urban  | 71                  | 7.36                                  | 0.98                                   | 6.38                         | -6.38                      | 86.72   | -86.72  | 7.69                         |

**Table S5:** Percentage change (%) in pollutant emissions between the 2000s and 2010s.

|                                      | OC  | BC  | NH <sub>3</sub> | NO <sub>x</sub> | SO <sub>2</sub> | ARO | ALK | OLE | C5H8 | TERP | VOC |
|--------------------------------------|-----|-----|-----------------|-----------------|-----------------|-----|-----|-----|------|------|-----|
| Southern Asia                        | 27  | 49  | 81              | 112             | 140             | 58  | 93  | 45  | 27   | 129  | 65  |
| Europe                               | -9  | -45 | -3              | -38             | -55             | -47 | -44 | -41 | -52  | 4    | -45 |
| Africa                               | 42  | 56  | 60              | 54              | 37              | 61  | 40  | 86  | 76   | 16   | 59  |
| South-East Asia & Developing Pacific | 30  | 51  | 36              | 75              | 27              | 39  | 43  | 53  | 44   | 99   | 43  |
| Latin America & Caribbean            | 53  | 23  | 42              | 41              | 1               | 13  | 12  | 10  | 24   | 127  | 12  |
| Eurasia                              | -30 | -11 | 12              | -7              | -17             | -22 | -1  | -19 | 10   | 179  | -13 |
| Asia-Pacific                         | 2   | -30 | 23              | -28             | -14             | -11 | -29 | -30 | -28  | -13  | -12 |
| Developed                            |     |     |                 |                 |                 |     |     |     |      |      |     |
| Middle East                          | 26  | 50  | 24              | 75              | 93              | 14  | 9   | 7   | -3   | 119  | 10  |
| North America                        | -12 | -38 | 19              | -47             | -65             | -36 | -45 | -59 | -73  | -4   | -42 |
| Eastern Asia                         | 14  | 48  | 50              | 85              | 44              | 99  | 40  | 10  | 112  | 244  | 58  |

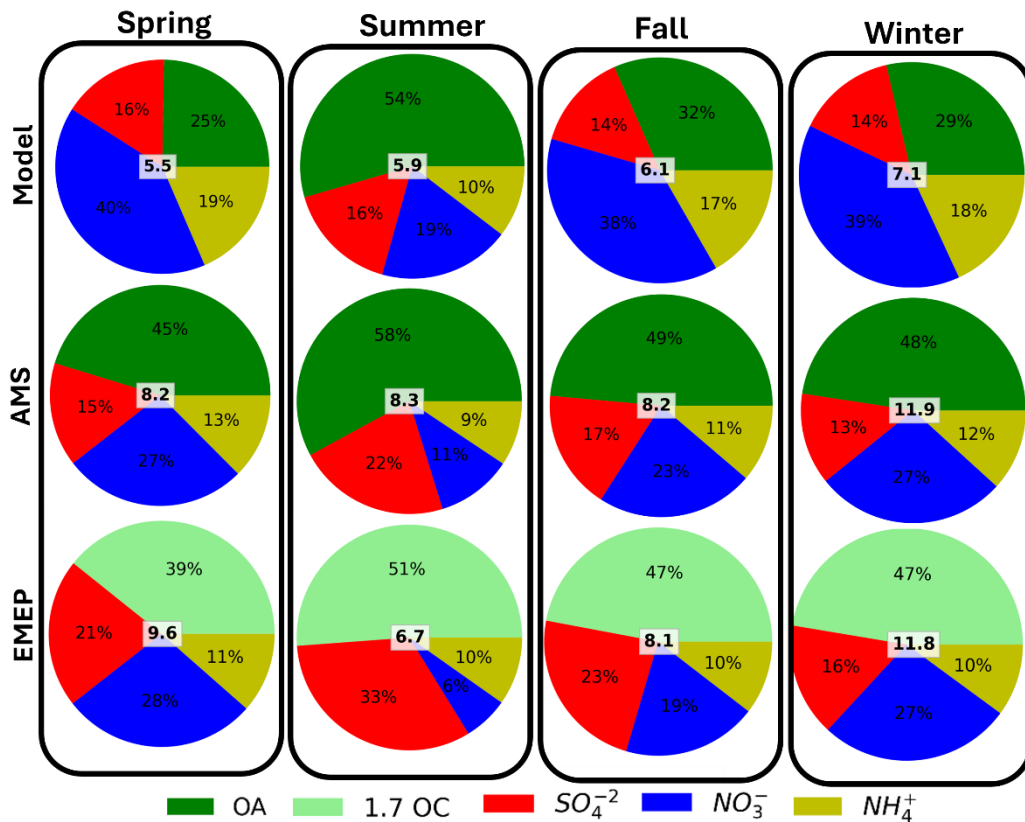

**Figure S1.** Seasonal aerosol composition in Europe from EMAC simulation, AMS observations and EMEP filter measurements during 2000-2020. The white boxes indicate the seasonal mean of the total PM concentration (in  $\mu\text{g m}^{-3}$ ), the numbers in the respective pie slices indicate the relative contribution of each element (in %).

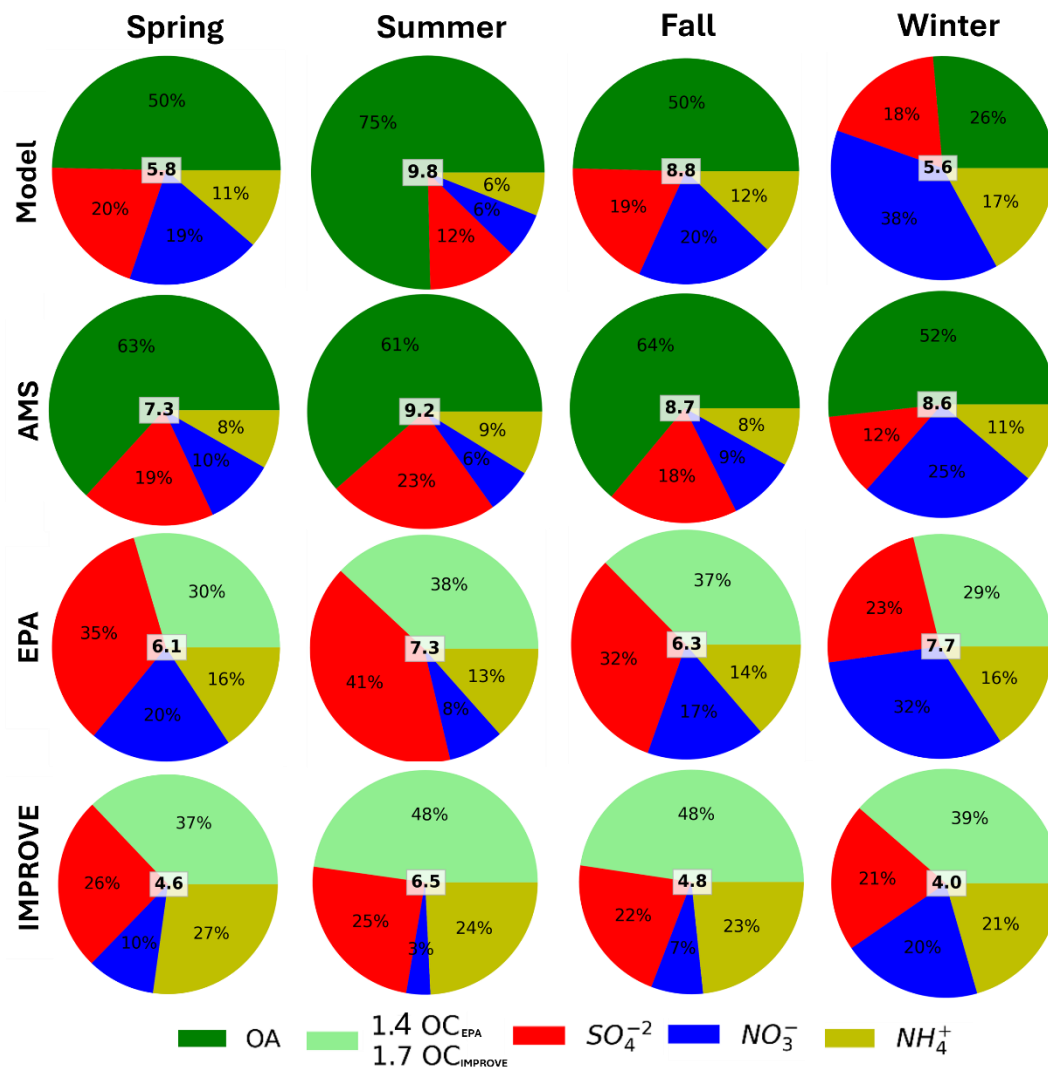

**Figure S2.** Seasonal aerosol composition in North America from EMAC simulation, AMS observations and IMPROVE and EPA filter measurements during 2000-2020. The white boxes indicate the seasonal mean of the total PM concentration (in  $\mu g m^{-3}$ ), the numbers in the respective pie slices indicate the relative contribution of each element (in %).

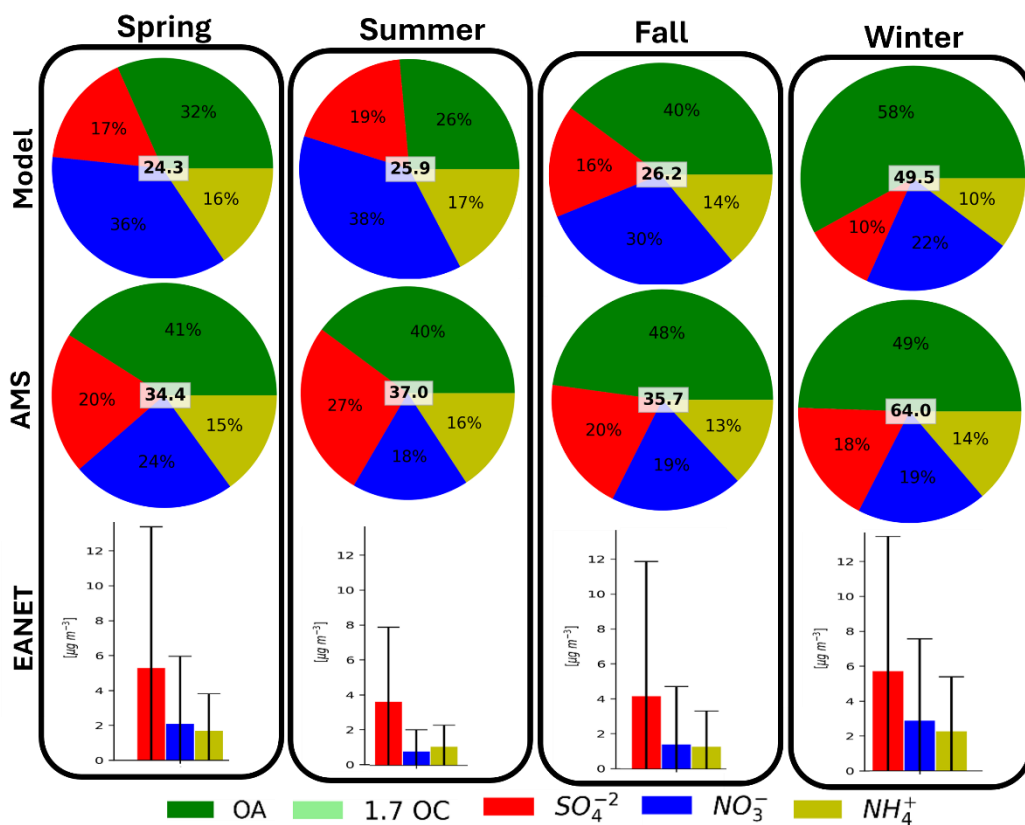

**Figure S3.** Seasonal aerosol composition in Eastern Asia from EMAC simulation, AMS observations and EANET filter measurements during 2000-2020. The white boxes indicate the seasonal mean of the total PM concentration (in  $\mu\text{g m}^{-3}$ ), the numbers in the respective pie slices indicate the relative contribution of each element (in %).

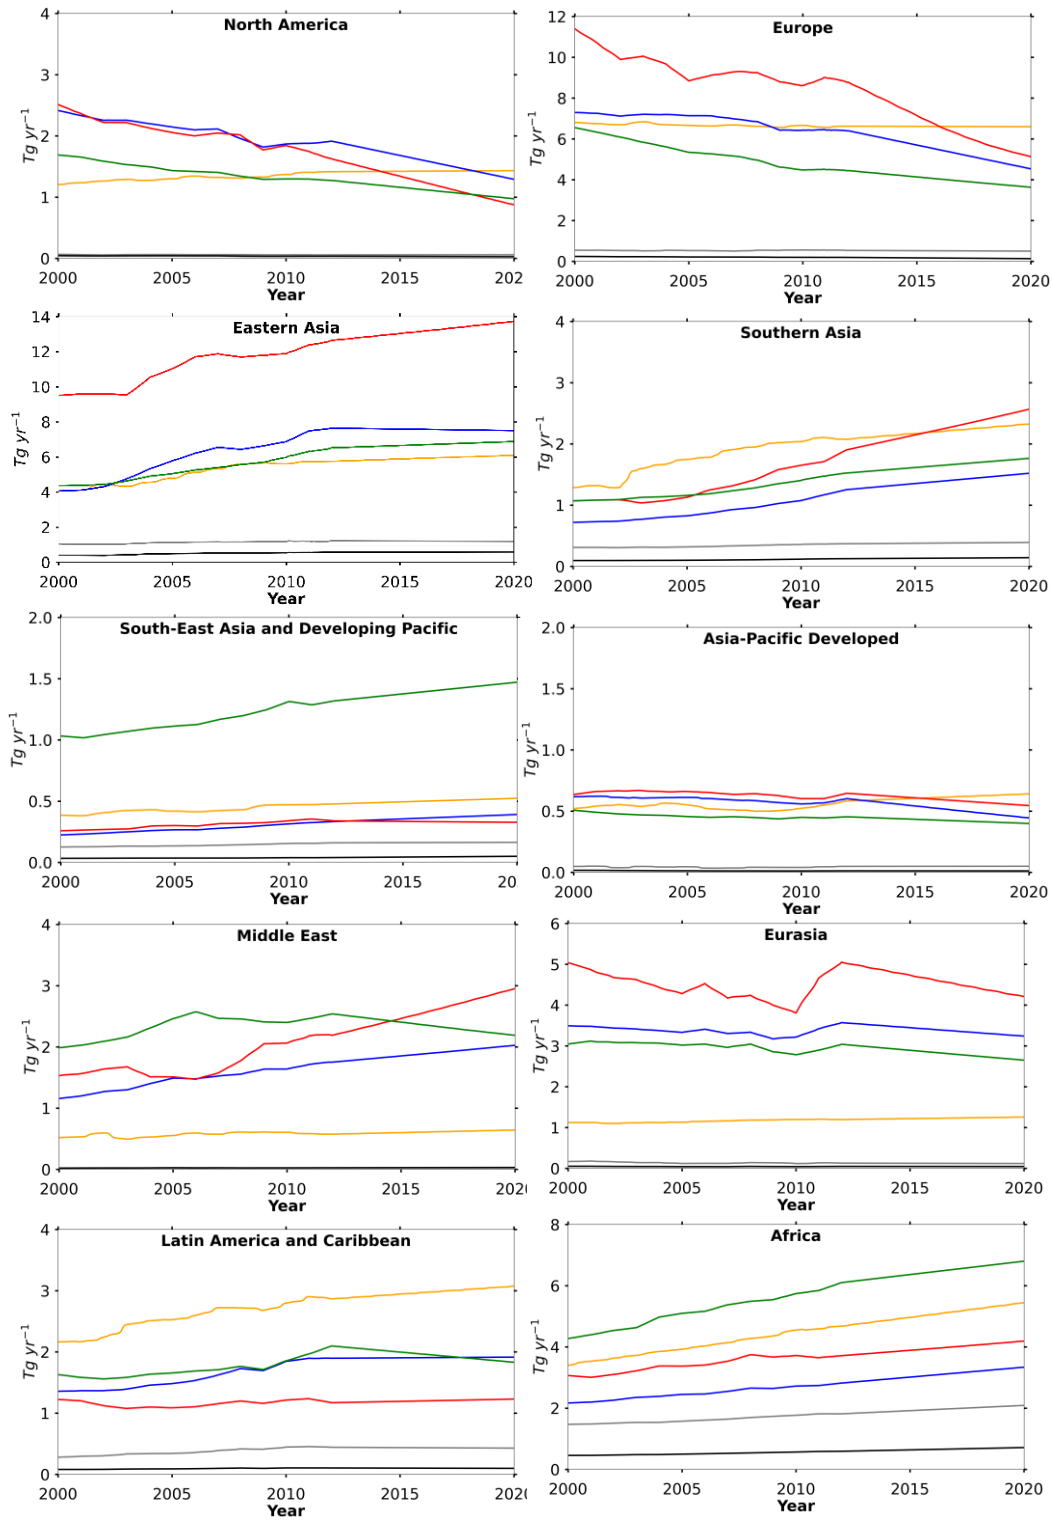

**Figure S4.** Temporal evolution of pollutant emissions in  $Tg\ yr^{-1}$  of OC (grey), BC (black),  $NH_3$  (orange),  $NO_x$  (blue),  $SO_2$  (red), and VOC (green) during the period 2000-2020 in the 10 regions considered according to WGIII AR6.

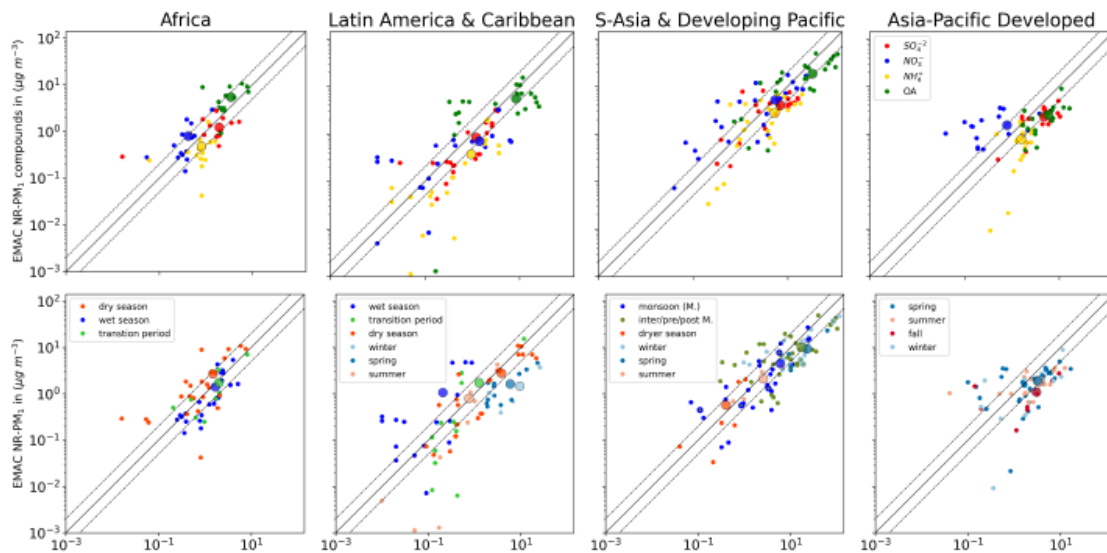

**Figure S5.** Scatter plots comparing EMAC results for  $PM_{10}$  concentrations (in  $\mu g m^{-3}$ ) with AMS and ASCM observations (top row) colored by the season of the field campaign and (bottom row) colored by the chemical composition. Each point represents the mean of the data set. Also shown are the 1:1, 2:1, and 1:2 lines.



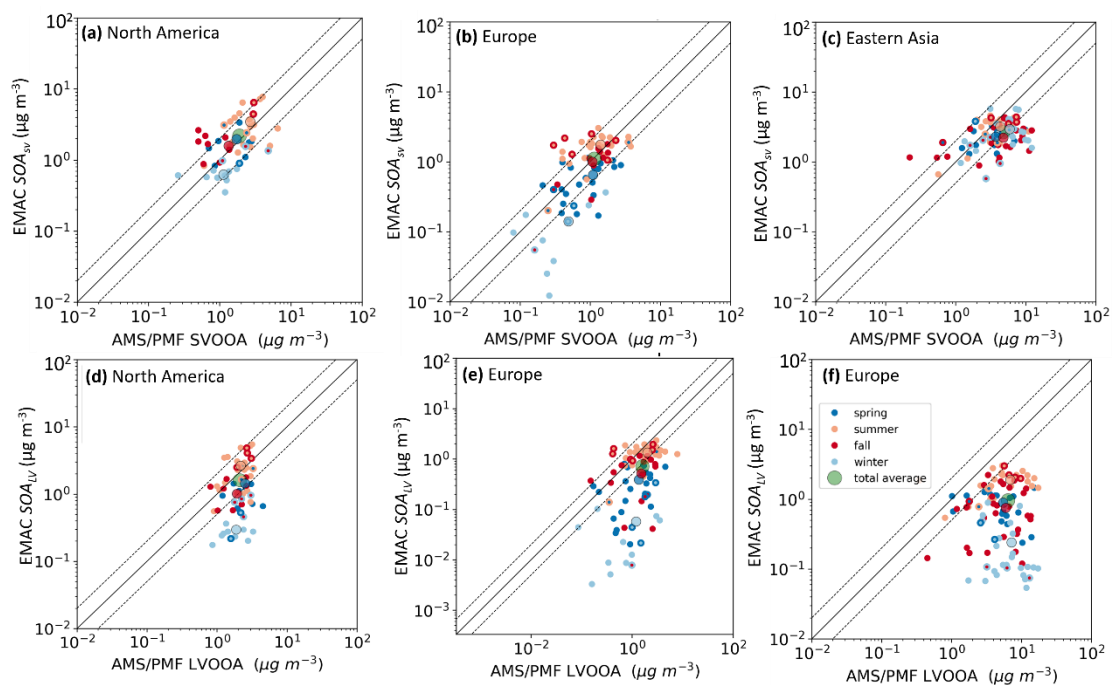

**Figure S6:** Scatter plots comparing model results for  $\text{PM}_1$   $\text{SOA}_{\text{SV}}$  (a-c) and  $\text{SOA}_{\text{IV}}$  (d-f) concentrations (in  $\mu\text{g m}^{-3}$ ) with AMS and ASCM observations of M-OOA and L-OOA, respectively, over North America (a, d), Europe (b, e), and Eastern Asia (c, f). Each point represents the data set mean and is colored based on the season of the field campaign. Also shown are the 1:1, 2:1, and 1:2 lines.
